# Supplementary material for: The pressure induced phase diagram of double-layer ice under confinement: a first-principles study
Source: Royal Society of Chemistry journal article supplement (doi:10.1039/d2cp01470j), 2022-01-01
Supplement: d2cp01470j1.pdf [file d2cp01470j1.pdf]

## Supporting Information

### **Pressure induced phase diagram of double-layer ice under confinement: A first-principles study**

M. V. Jyothirmai<sup>1</sup>, B. Moses Abraham<sup>1</sup> and Jayant K. Singh<sup>1,2\*</sup>

<sup>1</sup>*Department of Chemical Engineering, Indian Institute of Technology Kanpur, Kanpur-208016, India.*

<sup>2</sup>Prescience Insilico Private Limited, Bangalore 560049, India.

\*E-mail: jayantks@iitk.ac.in

**Table S1:** Computed lattice cohesive energy per water molecule ( $E_{\text{latt}}$ ) using various DFT functionals.

|                | Buckled | HCP  | Hexagonal | Pentagonal | Square | Square-tube |
|----------------|---------|------|-----------|------------|--------|-------------|
| <b>LDA</b>     | 0.86    | 0.85 | 0.93      | 0.89       | 0.85   | 0.87        |
| <b>PBE</b>     | 0.45    | 0.48 | 0.57      | 0.51       | 0.48   | 0.49        |
| <b>TS</b>      | 0.55    | 0.58 | 0.63      | 0.59       | 0.57   | 0.58        |
| <b>D3</b>      | 0.55    | 0.57 | 0.64      | 0.59       | 0.56   | 0.58        |
| <b>optB88</b>  | 0.56    | 0.58 | 0.61      | 1.14       | 0.56   | 0.58        |
| <b>optB86B</b> | 0.55    | 0.58 | 0.61      | 0.58       | 0.56   | 0.58        |

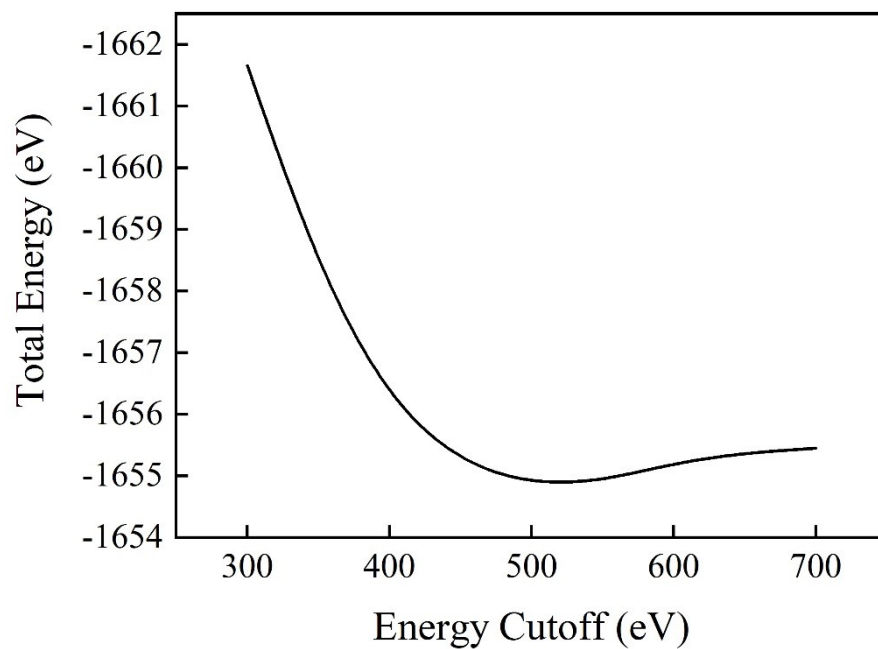

**Figure S1:** Relative energies of carbon nanotube as a function of cutoff values by using DFT-D3 dispersion correction method.

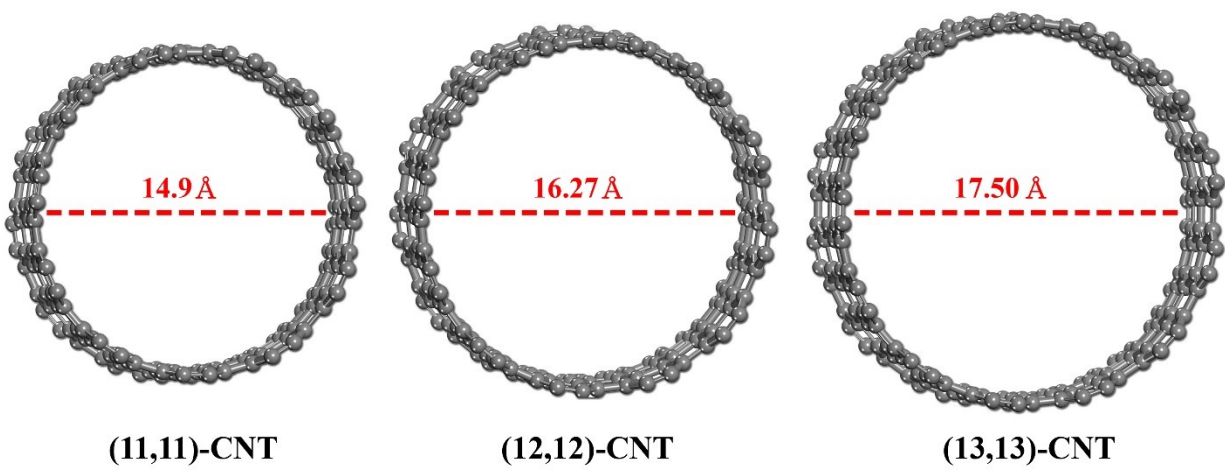

Figure S2: Optimized structures of (11,11)-CNT, (12,12)-CNT and (13,13)-CNT with a diameter of 14.9, 16.27 and 17.50 Å, respectively. The grey color balls represent carbon atoms.
